# Supplementary material
Source: PubMed Central journal article supplement (PMC6445175)
Supplement: Supp_Fig1.pdf [file Supp_Fig1.pdf]

## Supplementary Data

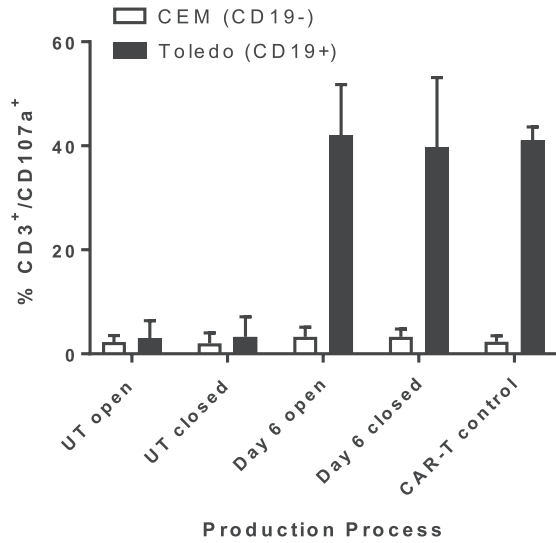

**Supplementary Figure S1.** Comparison of CD107a upregulation in CD19 CAR-T cells manufactured using an open versus functionally closed system. Following PBMC transduction, CD19 CAR-T cells were washed and resuspended in cell expansion medium grown for 4 days in bags (closed) or in upright T175 flasks (open). Upregulation of CD107a was measured by FACS following co-culture with either CD19<sup>+</sup> (Toledo, black bars) or CD19<sup>-</sup> (CEM, open bars) targets. Data from five independent experiments represented as the mean  $\pm$  the standard error of the mean (SEM).
