# Supplementary material
Source: PubMed Central journal article supplement (PMC6445175)
Supplement: Supp_Fig2.pdf [file Supp_Fig2.pdf]

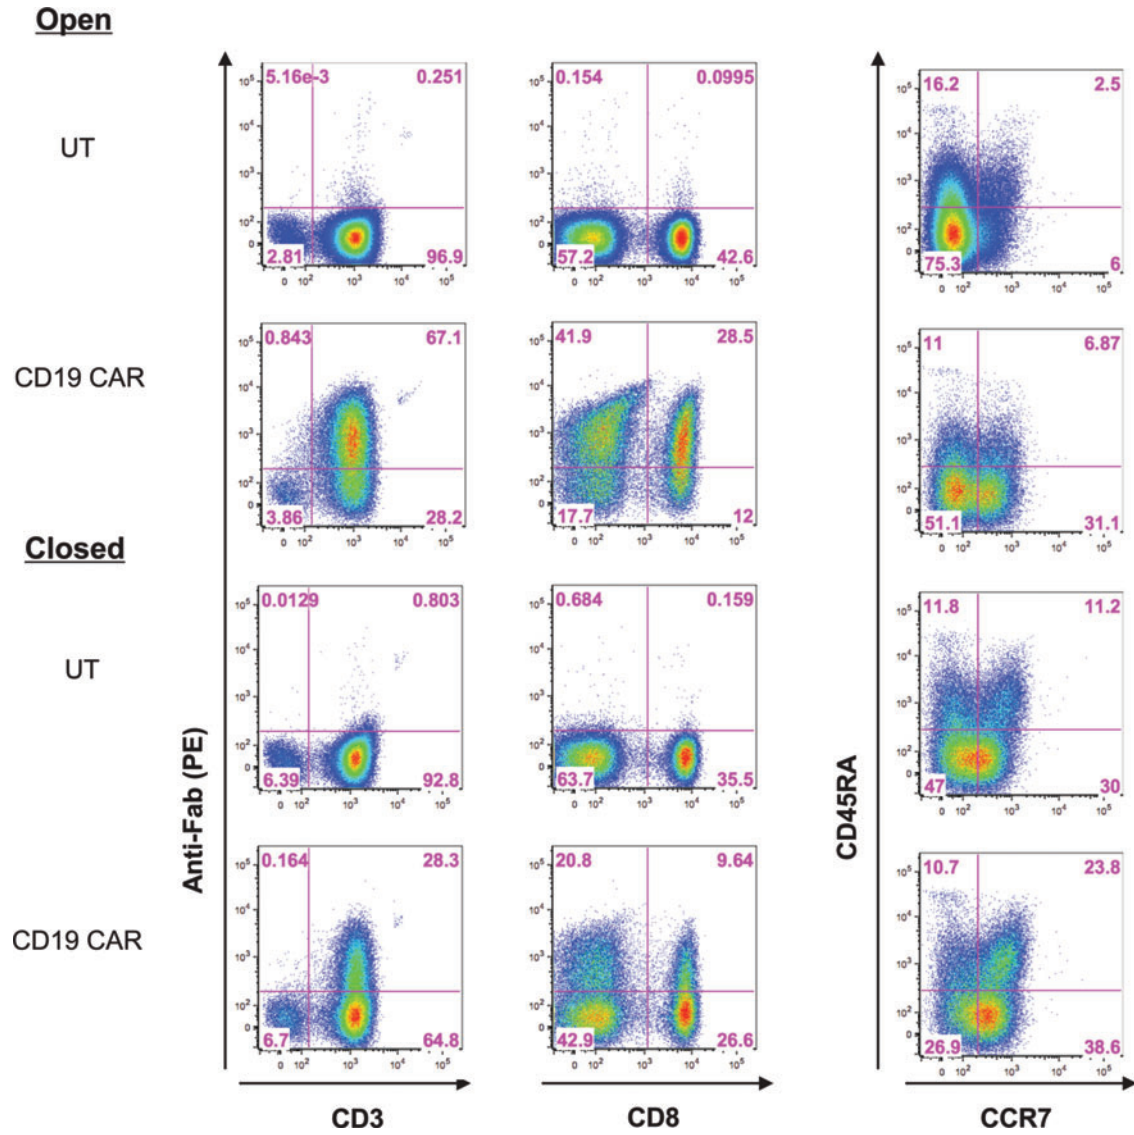

**Supplementary Figure S2.** Phenotypic characterization of CD19 CAR-T cells manufactured using an open or functionally closed production process. Live CD3<sup>+</sup> lymphocytes were gated on CD8 or CCR7 and CD45RA. The T lymphocytes were comprised of the following T-cell subsets: Naive (CCR7<sup>+</sup>/CD45RA<sup>+</sup>), Tcm (CCR7<sup>+</sup>/CD45RA<sup>-</sup>), Tem (CCR7<sup>-</sup>/CD45RA<sup>-</sup>) and Teff (CCR7<sup>-</sup>/CD45RA<sup>+</sup>). Representative FACS plots from a single experiment (*n*=5) are presented.
